# Supplementary material for: Specific protein homeostatic functions of small heat‐shock proteins increase lifespan
Source: PubMed Central journal article supplement (PMC4783350; doi:10.1111/acel.12422), 2015-12-25

**A The Drosophila small HSP family**

| CG number | Gene name      | Chromosome | Locus | GeneID  |
|-----------|----------------|------------|-------|---------|
| CG4460    | <i>HSP22</i>   | 3L         | 67B   | 3772576 |
| CG4463    | <i>HSP23</i>   | 3L         | 67B   | 39077   |
| CG4183    | <i>HSP26</i>   | 3L         | 67B   | 39075   |
| CG4466    | <i>HSP27</i>   | 3L         | 67B   | 39078   |
| CG4167    | <i>HSP67BA</i> | 3L         | 67B   | 39076   |
| CG4190    | <i>HSP67BC</i> | 3L         | 67B   | 39071   |
| CG4533    | <i>L(2)EFL</i> | 2R         | 59F   | 37744   |
| CG4461    | -              | 3L         | 67B   | 39074   |
| CG7409    | -              | 3L         | 66A   | 38870   |
| CG13133   | -              | 2L         | 31A   | 34342   |
| CG14207   | -              | X          | 18D   | 32955   |

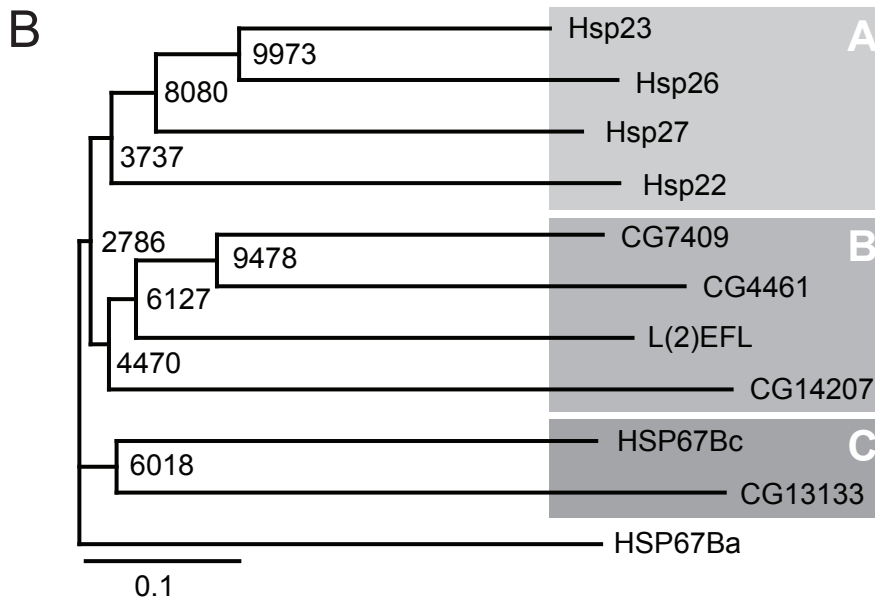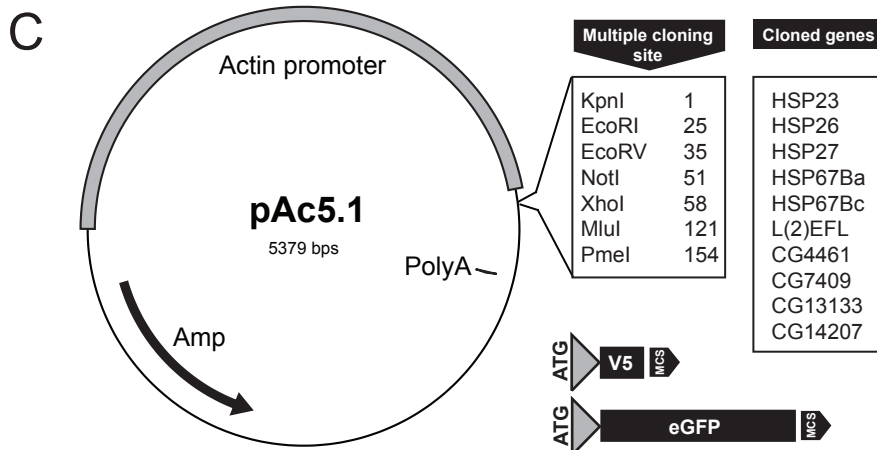

Supplement: ACEL-15-217-s001.pdf [file ACEL-15-217-s001.pdf]
