# Supplementary material for: Specific protein homeostatic functions of small heat‐shock proteins increase lifespan
Source: PubMed Central journal article supplement (PMC4783350; doi:10.1111/acel.12422), 2015-12-25

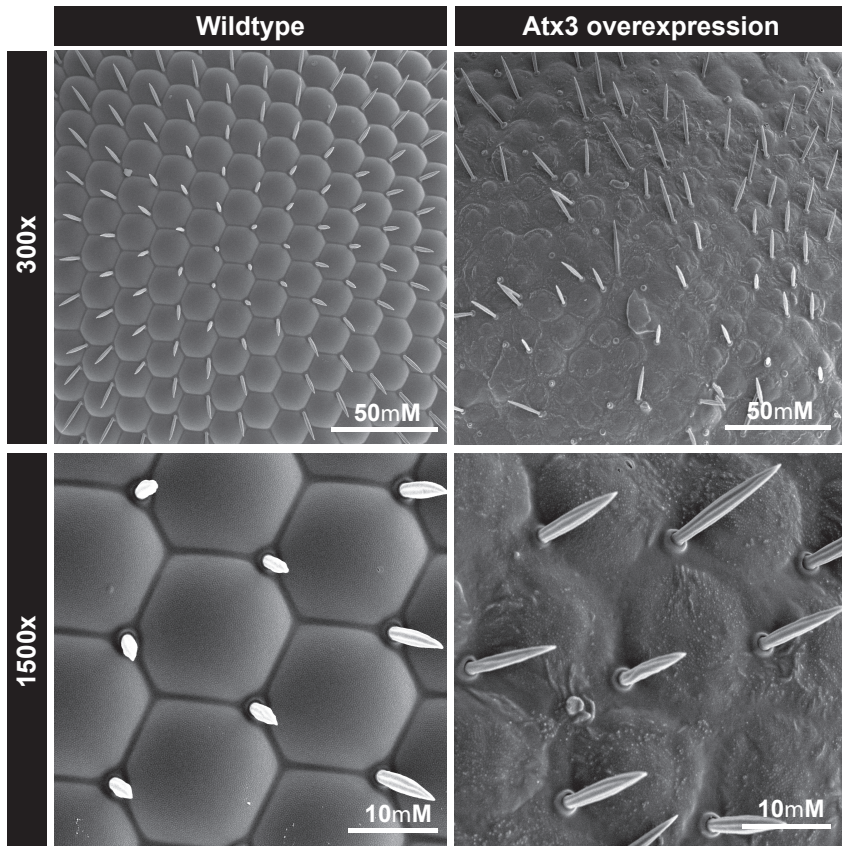

Supplement: ACEL-15-217-s002.pdf [file ACEL-15-217-s002.pdf]
