# Supplementary material for: Specific protein homeostatic functions of small heat‐shock proteins increase lifespan
Source: PubMed Central journal article supplement (PMC4783350; doi:10.1111/acel.12422), 2015-12-25
Supplement: ACEL-15-217-s003.pdf [file ACEL-15-217-s003.pdf]

**Table S1** Drosophila lines used in this study

| Name               | Genotype and characteristics                                                                  | Reference        |
|--------------------|-----------------------------------------------------------------------------------------------|------------------|
| W1118              | Wildtype strain                                                                               | Genetic Services |
| W1118-TM3          | TM3, Ser1, Sb1                                                                                | This study       |
| SCA3trQ78          | GMR-GAL4 UAS-SCA3trQ78/In(2LR), Cy                                                            | N. Bonini        |
| HSP67BC-L1         | UAS-V5-CG4190-A7/TM3, Ser1, Sb1                                                               | This study       |
| HSP67BC-L2         | UAS-V5-CG4190-F1/TM3, Ser1, Sb1                                                               | This study       |
| HSP67BC-L3         | UAS-V5-CG4190-F2/TM3, Ser1, Sb1                                                               | This study       |
| CG4461-L1          | UAS-V5-CG4461-L04/In(2LR)O,Cy                                                                 | This study       |
| CG4461-L2          | UAS-V5-CG4461-L05/In(2LR)O,Cy                                                                 | This study       |
| CG4461-L3          | UAS-V5-CG4461-L07/TM3, Ser1, Sb1                                                              | This study       |
| CG4461-L4          | UAS-V5-CG4461-L10/In(2LR)O,Cy                                                                 | This study       |
| CG14207-L3         | UAS-V5-CG14207-B6/TM3, Ser1, Sb1                                                              | This study       |
| CG14207-L4         | UAS-V5-CG14207-B7/TM3, Ser1, Sb1                                                              | This study       |
| HSP67BC RNAi 1     | UAS-HSP67BC-RNAi / VDRC Transformant ID 26416                                                 | VDRC             |
| HSP67BC RNAi 2     | UAS-HSP67BC-RNAi / VDRC Transformant ID 26417                                                 | VDRC             |
| <i>actin</i> -GAL4 | y[1] w[*]; P{w[+mC]=Act5C-GAL4}25FO1/CyO, y[+] / 4414 / ubiquitous expression                 | Bloomington      |
| <i>elav</i> -GAL4  | w <sup>*</sup> ; P{GAL4-elav.L}2/CyO / 8765 / high expression in CNS                          | Bloomington      |
| <i>ey</i> -GAL4    | y <sup>1</sup> w <sup>1118</sup> ; P{ey1x-GAL4.Exel}2 / 8228 / moderate ubiquitous expression | Bloomington      |
| <i>gmr</i> -GAL4   | w[*]; P{w[+mC]=GAL4-ninaE.GMR}12 / 1104 / expression in eye tissue                            | Bloomington      |
