# Supplementary material for: Specific protein homeostatic functions of small heat‐shock proteins increase lifespan
Source: PubMed Central journal article supplement (PMC4783350; doi:10.1111/acel.12422), 2015-12-25
Supplement: ACEL-15-217-s004.pdf [file ACEL-15-217-s004.pdf]

Table S2 Primers used for molecular cloning

| Gene family          | Primer name                    | Primer sequence (5'-3')                                           |
|----------------------|--------------------------------|-------------------------------------------------------------------|
| <b>sHSP</b>          | HSP23 F                        | ACCCCTCGAGCACCATGGCAAATATTCCATTGTTGT                              |
|                      | HSP23 R                        | ACCCACGCGTAAATAATGCAGGGCATCTCT                                    |
|                      | HSP26 F                        | ACCGCTCGAGGACCATGTCGCTATCTACTCTGCTTTC                             |
|                      | HSP26 R                        | ACCCACGCGTGGCTCCTTTACTTGTCTTG                                     |
|                      | HSP27 F                        | ACCAGCTCGAGACCATGTCAATTATAACCACTGCTGCAC                           |
|                      | HSP27 R                        | ACCCACGCGTTTTCTCGTCTTCTTCATCTCCTAGTC                              |
|                      | L(2)EFL F                      | ACAACTCGAGAACCATGTCCGTAGTGCCACTGAT                                |
|                      | L(2)EFL R                      | ACCCACGCGTACTAACAACACTGAAGGCGGTACA                                |
|                      | HSP67Ba F                      | ACCACTCGAGGACCATGTCGCTGATACCGTTCATAC                              |
|                      | HSP67Ba R                      | ACCCACGCGTTCACCTTGGCCAGTTCCTCGGTTT                                |
|                      | HSP67Bc F                      | ACCCCTCGAGCACCATGCCAGATATTCCCTTTGT                                |
|                      | HSP67Bc R                      | ACCTACGCGTTCACCTTGGCTTCTGGCTCTG                                   |
|                      | CG4461 F                       | ACGCCTCGAGAGAAATGTCTCTGGTGCCTACC                                  |
|                      | CG4461 R                       | ACCGACGCGTGACACATGGTCCACTATTTCC                                   |
|                      | CG7409 F                       | ACAACTCGAGAACCATGGCTCTTGTCCCGGCTAC                                |
|                      | CG7409 R                       | ACCCACGCGTCTGTGATTAGTTCTTGATGC                                    |
|                      | CG13133 F                      | AAACCTCGAGAACCATGCCCATCCACTGGGACTG                                |
|                      | CG13133 R                      | AACCACGCGTTCATTTGTCCATCGCCGTGCCAGCAG                              |
|                      | CG14207 F                      | AACCCTCGAGAACCATGGCCGAGGCTAACAAGAGG                               |
|                      | CG14207 R                      | ACCCACGCGTACTGGATAGCTGGACAACCTGGA                                 |
|                      | <b>HSP40</b>                   | MRJ F                                                             |
| MRJ R                |                                | ACAAACGCGTGCTATTGAAGGGAGCCCATC                                    |
| <b>HSP70</b>         | DmHSP70Aa                      | GCGCGATATCACCATGCCTGCTATTGGAATCGATC                               |
|                      | DmHSP70Aa                      | GCAGCTCGAGTTAGACTCTTTGGCCTTAGTCG                                  |
|                      | HSC70-2                        | ACCAGATATCACCATGGGTAAAATTCCGGCCATCGGCATCG                         |
|                      | HSC70-2                        | ACCAGCGGCCGCGGTCCGTGGATCGTACTATC                                  |
|                      | HSC70-4                        | ACAAGCGGCCGCAAGATGTCTAAAGCTCCTGCTGTT                              |
| HSC70-4              | ACAAACGCGTATGGTTTAGTCGACCTCCTC |                                                                   |
| <b>Modifications</b> |                                |                                                                   |
|                      | <b>L4440-Xcml</b>              |                                                                   |
|                      | Xcml-F stuf                    | TCGACCATGGTTTTGTTGGCCATGTTATCCATGG                                |
|                      | Xcml-R stuf                    | GATCCCATGGATAACATGGCCAACAAAACCATGG                                |
| <b>pAc5.1-V5</b>     | V5 stuffer F                   | AGTACTACCATGGGTAAGCCTATCCCTAACCCTCTCCTCGGT<br>CTCGATTCTACGGAT     |
|                      | V5 stuffer R                   | ATCCGTAGAATCGAGACCGAGGAGAGGGTTAGGGATAGGCT<br>TACCCATGGTAGTACTGTAC |
