# Supplementary material for: Specific protein homeostatic functions of small heat‐shock proteins increase lifespan
Source: PubMed Central journal article supplement (PMC4783350; doi:10.1111/acel.12422), 2015-12-25
Supplement: ACEL-15-217-s005.pdf [file ACEL-15-217-s005.pdf]

**Table S3** Primers used for the generation of dsRNA and specificities of the dsRNA sequences

| Primer name<br>or fly            | Primer sequence (5'-3')                        | Template                                | Region    | On-target<br>siRNA's | HSP off-target<br>Gene | Mismatch |          |          |
|----------------------------------|------------------------------------------------|-----------------------------------------|-----------|----------------------|------------------------|----------|----------|----------|
|                                  |                                                |                                         |           |                      |                        | 0        | 1        | 2        |
| HsMAZ-F<br>HsMAZ-F               | GTGGCGTCTAGATTCCTACAAG<br>AGGTATGCTGCCGTGGTGAA | NC_000016 REGION:<br>29725356..29730005 | 2310-3028 | 0                    | none                   |          |          |          |
| RNAi Hsp70x F<br>RNAi Hsp70x R   | AAGCATCGCCAGCGAATAAC<br>TCCAGAGTAGCCTCCAAATC   | CG31366-RA                              | 2088-2408 | 303*                 | HSP68                  | 3        | 22       | 14       |
| RNAi Hsc70-2 F<br>RNAi Hsc70-2 R | CCTTCGACGTCTCCGTAATC<br>GAATGGCCTTCTTGTCATC    | CG7756-PA                               | 807-1193  | 369                  | HSP70<br>HSC70-4       | 1<br>0   | 3<br>7   | 9<br>27  |
| RNAi Hsc70-4 F<br>RNAi Hsc70-4 R | TGAACGTGCTGCGTATCATC<br>AACGGGCACGAGTAATCGAG   | CG4264-PA                               | 655-1059  | 387                  | HSC70-3<br>HSP70       | 5<br>4   | 18<br>26 | 29<br>37 |
| <b>Transgenic lines</b>          |                                                |                                         |           |                      |                        |          |          |          |
| UAS-HSP67BC-RNAi                 | Obtained from VDRC                             |                                         |           | 322                  | HSP27                  | 0        | 1        | 6        |

\* This pool of siRNA's targets both the HSP70A and HSP70B members.  
On-target and off-target siRNA's were determined using dsCheck located at <http://dscheck.mai.jp>
