# Supplementary material for: Specific protein homeostatic functions of small heat‐shock proteins increase lifespan
Source: PubMed Central journal article supplement (PMC4783350; doi:10.1111/acel.12422), 2015-12-25
Supplement: ACEL-15-217-s006.pdf [file ACEL-15-217-s006.pdf]

Table S4 Plasmids used in this study

|                | Plasmid name        | Characteristics                                     | Reference  |
|----------------|---------------------|-----------------------------------------------------|------------|
| <b>Cloning</b> | pAc5.1              | <i>Dm</i> Actin promoter                            | Invitrogen |
|                | pAc5.1-V5           | <i>Dm</i> Actin promoter / N-terminal V5-tag        | This study |
|                | pUAST-V5            | Transformation vector / N-terminal V5-tag           | This study |
|                | L4440-T/A           | Adapted RNAi feeding vector (Fire laboratory)       | This study |
| <b>General</b> | pAc5.1-EGFP         | Enhanced Green Fluorescent Protein                  | This study |
|                | pAc5.1-Luc-EGFP     | EGFP tagged luciferase / cloned from pGL3 (Promega) | This study |
|                | pAc5.1-HttQ119-EGFP | EGFP tagged Huntingtin exon 1 with 119 glutamines   | This study |
| <b>sHSP</b>    | pAc5.1-V5-HSP23     | <i>Dm</i> HSP23 / GeneID: 39077                     | This study |
|                | pAc5.1-V5-HSP26     | <i>Dm</i> HSP26 / GeneID: 39075                     | This study |
|                | pAc5.1-V5-HSP27     | <i>Dm</i> HSP27 / GeneID: 39078                     | This study |
|                | pAc5.1-V5-HSP67BA   | <i>Dm</i> HSP67BA / GeneID: 39076                   | This study |
|                | pAc5.1-V5-HSP67BC   | <i>Dm</i> HSP67BC / GeneID: 39071                   | This study |
|                | pAc5.1-V5-L(2)EFL   | <i>Dm</i> L(2)EFL / GeneID: 37744                   | This study |
|                | pAc5.1-V5-CG4461    | <i>Dm</i> CG4461 / GeneID: 39074                    | This study |
|                | pAc5.1-V5-CG7409    | <i>Dm</i> CG7409 / GeneID: 38870                    | This study |
|                | pAc5.1-V5-CG13133   | <i>Dm</i> CG13133 / GeneID: 34342                   | This study |
|                | pAc5.1-V5-CG14207   | <i>Dm</i> CG14207 / GeneID: 32955                   | This study |
| <b>HSP40</b>   | pAc5.1-V5-MRJ       | <i>Dm</i> MRJ / GeneID: 36797                       | This study |
| <b>HSP70</b>   | pAc5.1-V5-HSP70AA   | <i>Dm</i> HSP70AA / GeneID: 48581                   | This study |
|                | pAc5.1-V5-HSC70-2   | <i>Dm</i> HSC70-2 / GeneID: 41609                   | This study |
|                | pAc5.1-V5-HSC70-4   | <i>Dm</i> HSC70-4 / GeneID: 41840                   | This study |
