# Supplementary material for: Specific protein homeostatic functions of small heat‐shock proteins increase lifespan
Source: PubMed Central journal article supplement (PMC4783350; doi:10.1111/acel.12422), 2015-12-25
Supplement: ACEL-15-217-s007.pdf [file ACEL-15-217-s007.pdf]

| <b>Table S5</b> Primers used for qPCR |                    |                                |
|---------------------------------------|--------------------|--------------------------------|
| <b>Gene family</b>                    | <b>Primer name</b> | <b>Primer sequence (5'-3')</b> |
| <b>sHSP</b>                           | qPCR HSP22 F       | CTGTCAAGAGTATAAATAGCCACC       |
|                                       | qPCR HSP22 R       | GTTGTCTGAGGTTTCAATCGT          |
|                                       | qPCR HSP23 F       | CAATGGCAACGATAAGTAGAG          |
|                                       | qPCR HSP23 R       | TGTGTATGAGTGAAGTGTCTT          |
|                                       | qPCR HSP26 F       | CGCATCATTCAAATTCAGCA           |
|                                       | qPCR HSP26 R       | ATGGCTCCTTTACTTGTCTT           |
|                                       | qPCR HSP27 F       | CTAGACAGGGTTGTGAATAAAGAG       |
|                                       | qPCR HSP27 R       | AAACCGAAGTCATCCTCCAG           |
|                                       | qPCR L(2)EFL F     | GAAGTTCGAGGTCATTCTGG           |
|                                       | qPCR L(2)EFL R     | CTTCTCCTCATGCTTTCCCT           |
|                                       | qPCR HSP67Ba F     | CACTTCCACTTTAAATCCGACTG        |
|                                       | qPCR HSP67Ba R     | TTTCCATCTCTGTCTCTTCTT          |
|                                       | qPCR HSP67Bc F     | GGTTCACCATTAGTTTCCA            |
|                                       | qPCR HSP67Bc R     | CCTCCTTATGACCGTTTCCA           |
|                                       | qPCR CG4461 F      | CCAGGGAAATCACAATCGTC           |
|                                       | qPCR CG4461R       | CTGGATATGTCCGAGATTACCT         |
|                                       | qPCR CG7409 F      | GATTGGGATTTGAACGACTGG          |
|                                       | qPCR CG7409 R      | TCTCATAGGGCTTGAACAGG           |
|                                       | qPCR CG13133 F     | GTGCACCACTTTCAGATCTC           |
|                                       | qPCR CG13133 R     | CTTGTAGGATCGCGTAAACTC          |
|                                       | qPCR CG14207 F     | TTAGCTCACCCCTTGATCCAG          |
|                                       | qPCR CG14207 R     | TTTGTGTCCGACTTCTCCTC           |
|                                       | <b>HSP70</b>       | qPCR HSP70Aa F                 |
| qPCR HSP70Aa R                        |                    | GTCTCAATTCCCAATGAAAGTG         |
| qPCR HSC70-4 F                        |                    | CTGCTGTTGGTATTGATTTGG          |
| qPCR HSC70-4 R                        |                    | CATAGGATGGAGTGGTACGA           |
| qPCR HSC70-5 F                        |                    | CACTATTCCCACCAAGAAGTC          |
| qPCR HSC70-5 R                        |                    | TTATTGTCGTTAGCCATCTCAC         |
| <b>General</b>                        | qPCR RpL32 F       | ACATGCTGCCCACCGGATTC           |
|                                       | qPCR RpL32 R       | GCGATCTCGCCGAGTAAAC            |
